# Supplementary material for: Genetic analysis of an F2 intercross between two chicken lines divergently selected for body-weight
Source: PubMed Central journal article supplement (PMC2695486; doi:10.1186/1471-2164-10-248), 2009-05-27

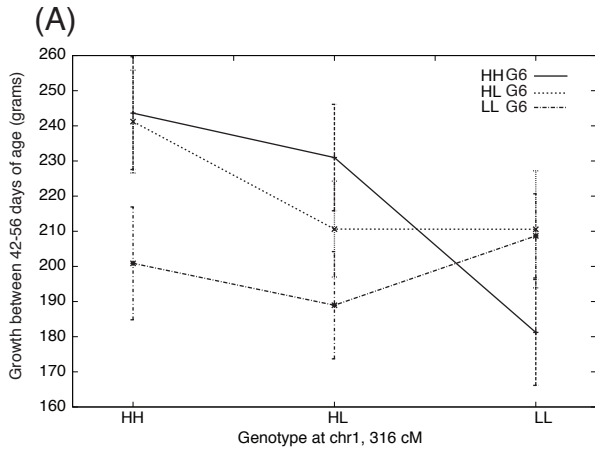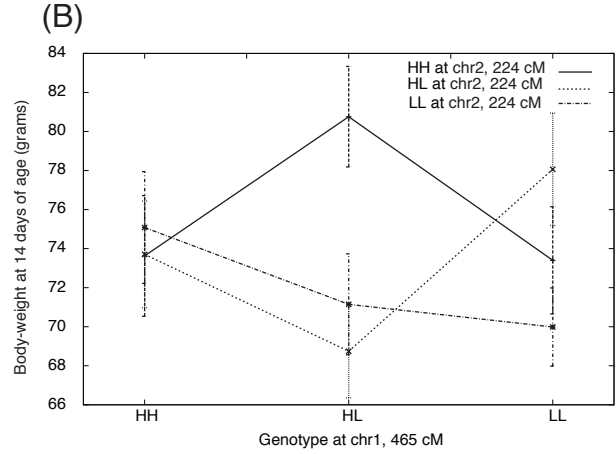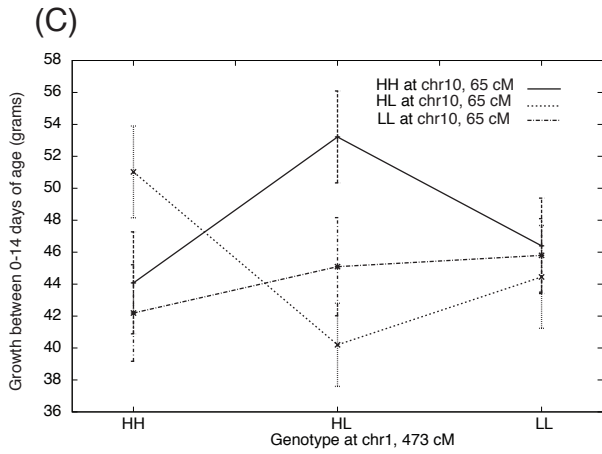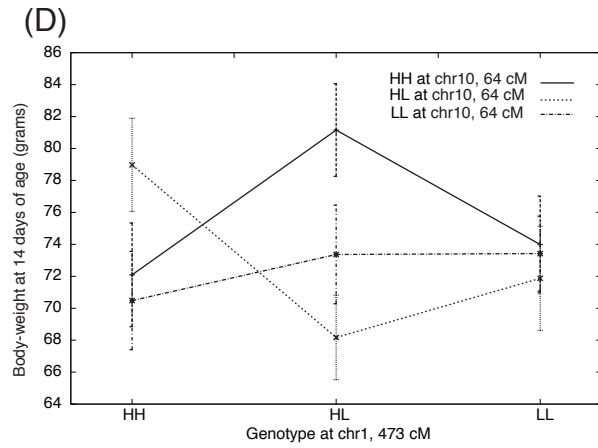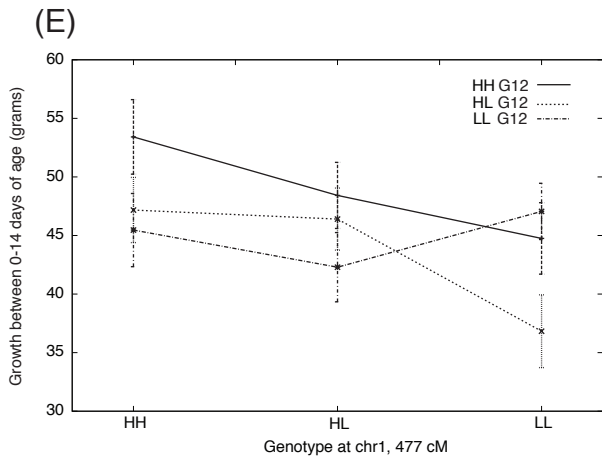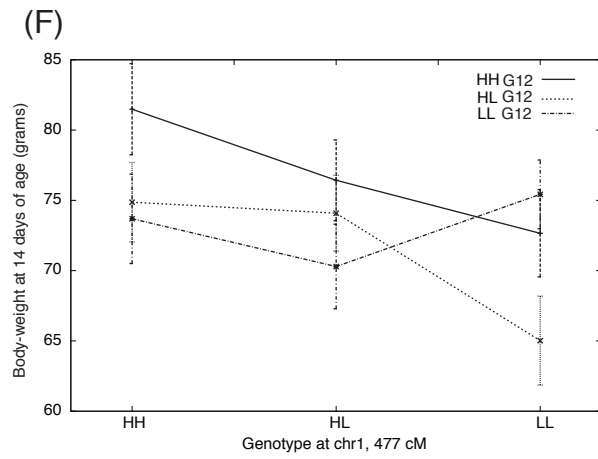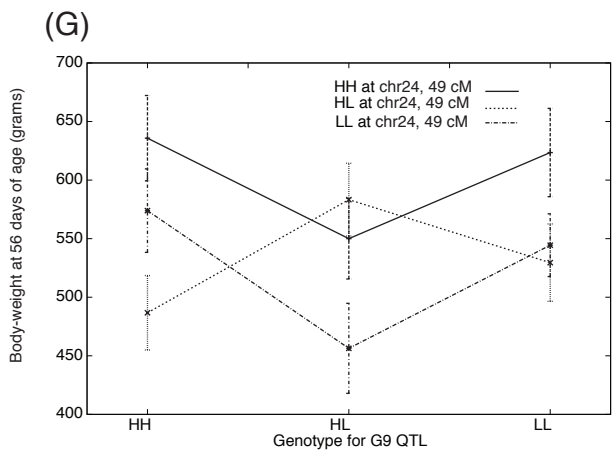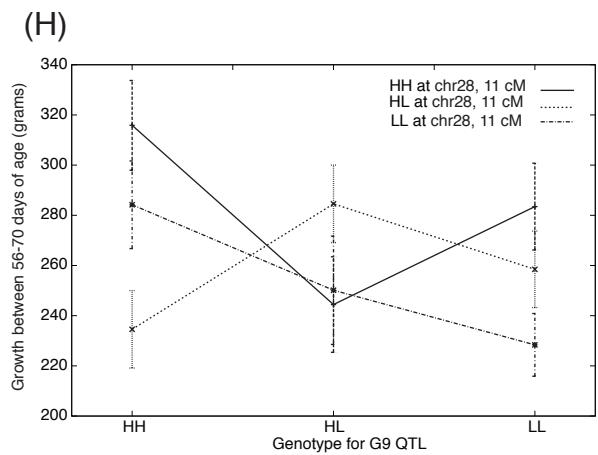

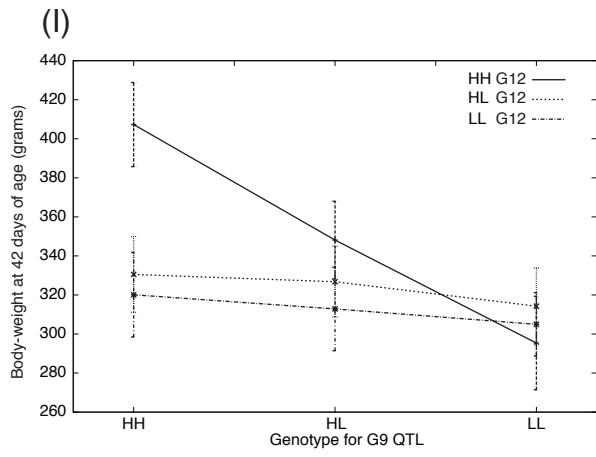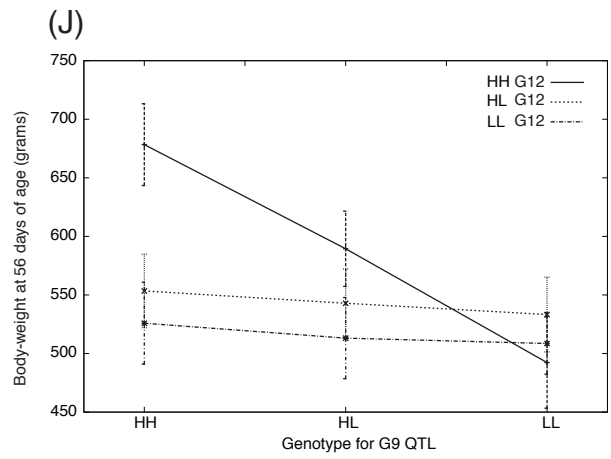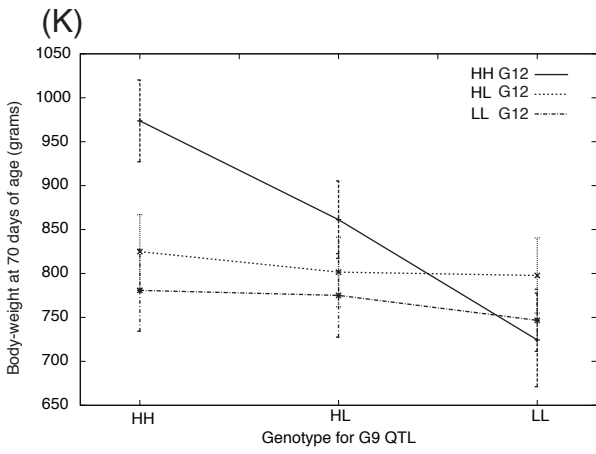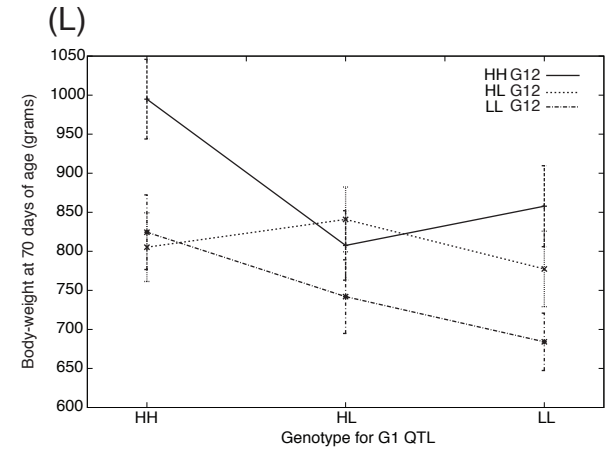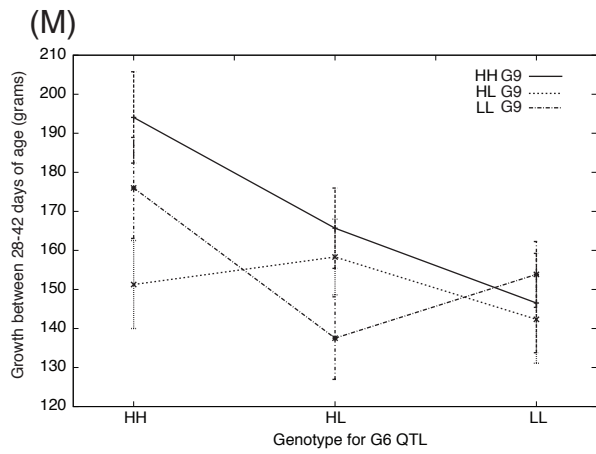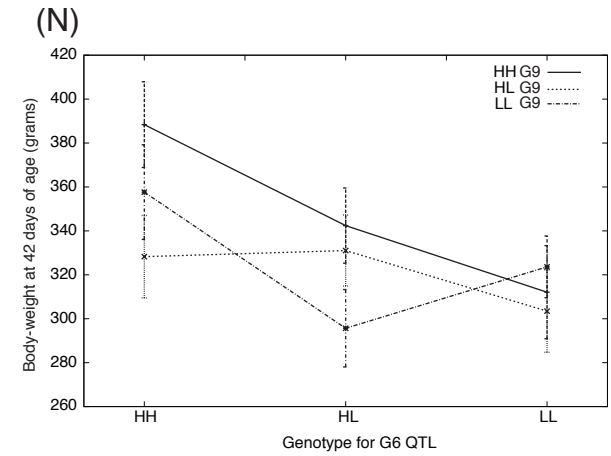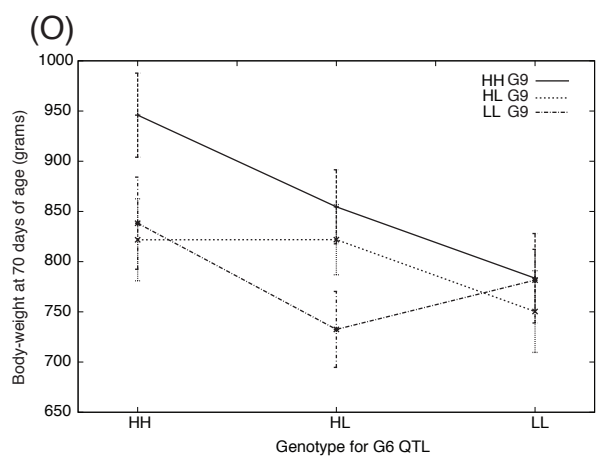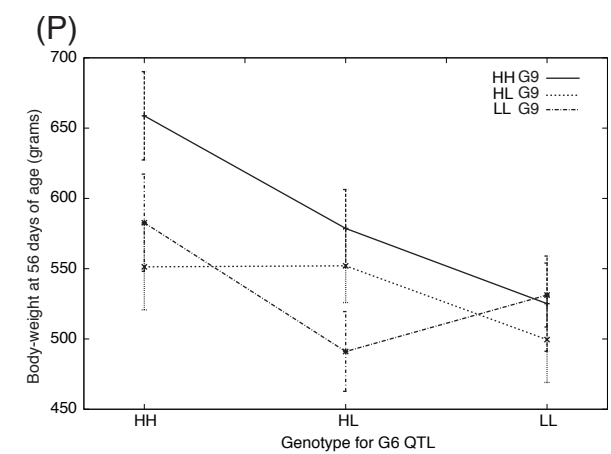

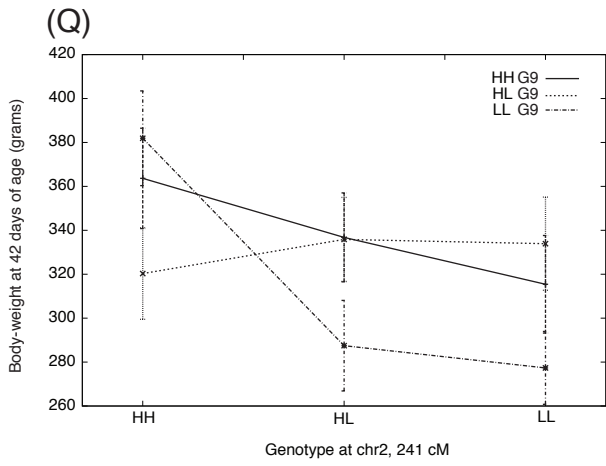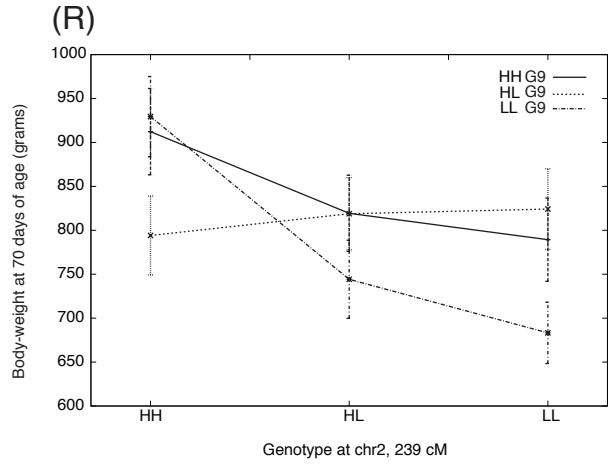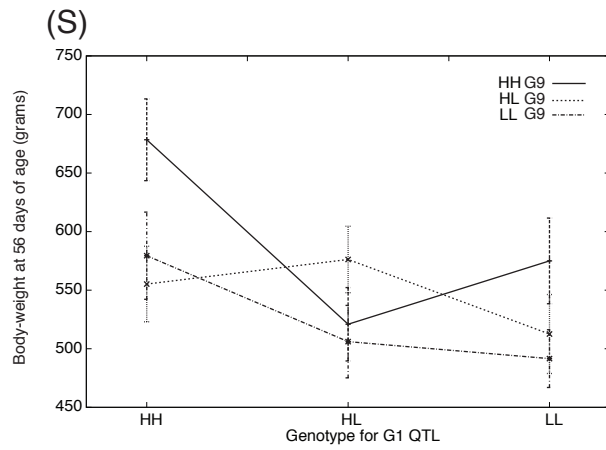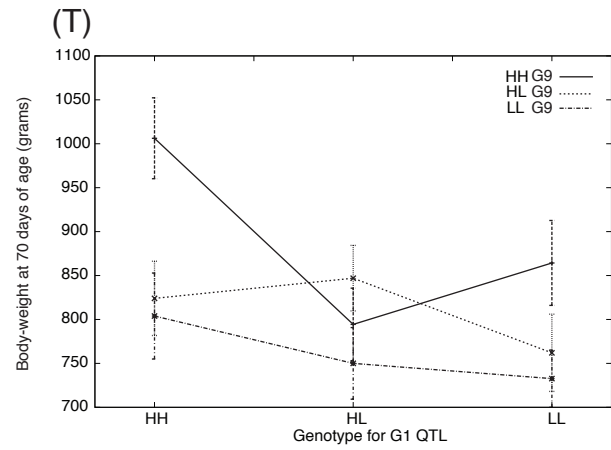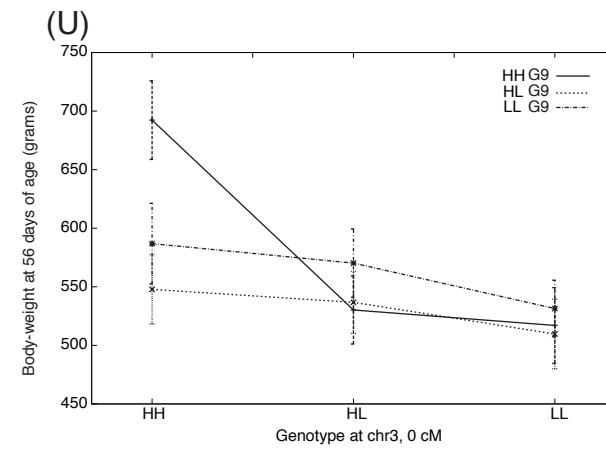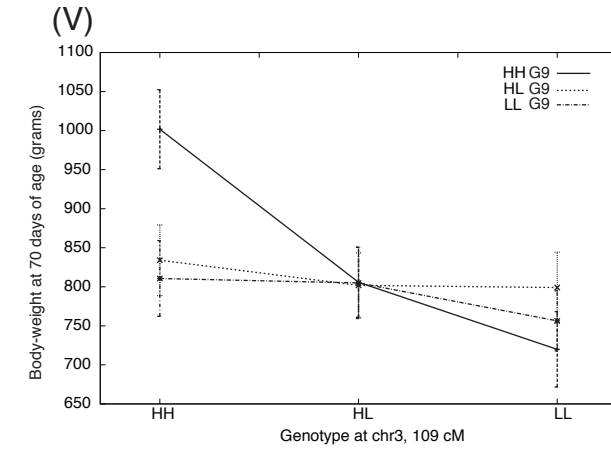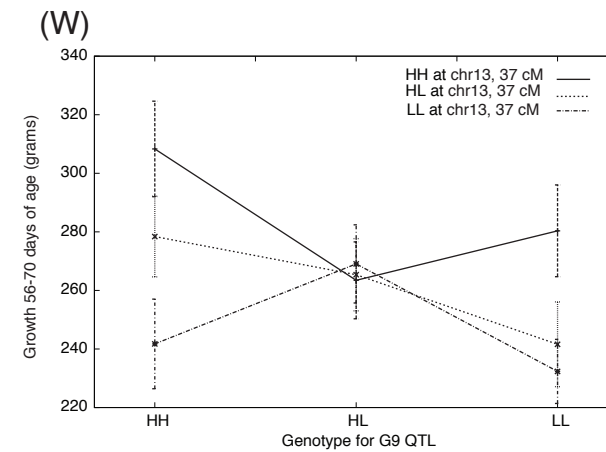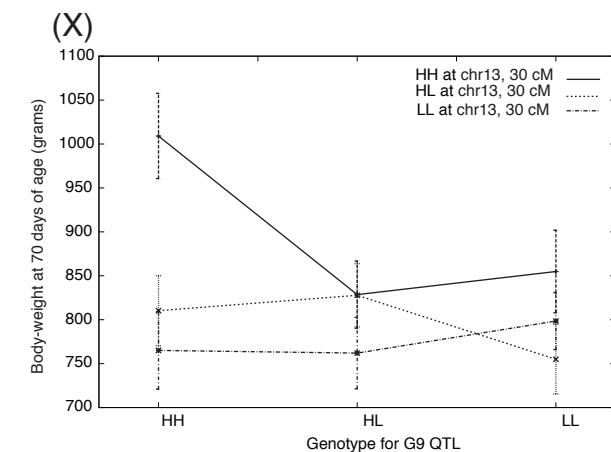

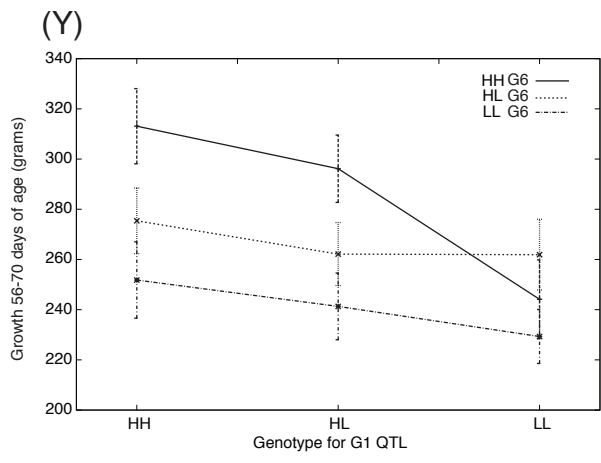

Supplement: 1471-2164-10-248-S2.pdf [file 1471-2164-10-248-S2.pdf]
