# Supplementary material for: Genetic analysis of an F2 intercross between two chicken lines divergently selected for body-weight
Source: PubMed Central journal article supplement (PMC2695486; doi:10.1186/1471-2164-10-248), 2009-05-27
Supplement: 1471-2164-10-248-S1.pdf [file 1471-2164-10-248-S1.pdf]

| Marker          | Chromosome <sup>a</sup> | cM    | Mb <sup>b</sup> |
|-----------------|-------------------------|-------|-----------------|
| RBL438          | 1                       | 0.0   | 0.3             |
| rs14080307      | 1                       | 36.0  | 0.7             |
| rs13824562      | 1                       | 41.7  | 2.4             |
| rs13621730      | 1                       | 47.5  | 6.1             |
| rs14795085      | 1                       | 57.1  | 13.8            |
| rs14792587      | 1                       | 63.4  | 15.9            |
| RBL1258         | 1                       | 68.6  | 17.2            |
| rs13837741      | 1                       | 78.1  | 24.6            |
| rs13842499      | 1                       | 89.9  | 29.1            |
| MCW0254         | 1                       | 92.3  | 31.4            |
| rs13847756      | 1                       | 101.1 | 34.9            |
| rs13851434      | 1                       | 115.4 | 38.0            |
| rs14816632      | 1                       | 127.1 | 45.1            |
| rs14818658      | 1                       | 135.1 | 47.8            |
| rs13865452      | 1                       | 149.3 | 52.5            |
| LEI0146         | 1                       | 159.7 | 55.3            |
| rs15276085      | 1                       | 167.5 | 57.9            |
| rs14828994      | 1                       | 170.1 | 58.6            |
| rs14832321      | 1                       | 176.3 | 61.8            |
| MCW0018         | 1                       | 187.9 | 65.7            |
| rs13880460      | 1                       | 196.0 | 68.6            |
| rs13883708      | 1                       | 210.5 | 71.5            |
| rs13819552      | 1                       | 218.2 | 74.0            |
| rs13819560      | 1                       | 218.6 | 74.0            |
| RBL2228         | 1                       | 219.0 | 74.2            |
| RBL4547         | 1                       | 219.2 | 74.3            |
| rs13834451      | 1                       | 220.3 | 9.9             |
| rs13997062      | 1                       | 221.3 | 75.0            |
| MCW0058         | 1                       | 222.9 | 79.0            |
| LEI0071         | 1                       | 223.7 | 79.5            |
| rs13887893      | 1                       | 230.5 | 80.9            |
| rs14693408      | 1                       | 230.8 | 81.4            |
| rs15318252      | 1                       | 235.1 | 82.3            |
| rs13583965      | 1                       | 250.6 | 86.1            |
| rs13646704      | 1                       | 255.3 | 87.6            |
| ADL0367         | 1                       | 266.7 | 91.6            |
| rs15340573      | 1                       | 268.1 | 92.1            |
| BU-1-1-85821084 | 1                       | 273.9 | na              |
| LEI0108         | 1                       | 280.6 | 97.1            |
| rs15353627      | 1                       | 282.9 | 99.6            |
| rs14864919      | 1                       | 286.9 | 104.2           |
| rs13914871      | 1                       | 291.5 | 107.8           |
| rs13918284      | 1                       | 301.1 | 110.5           |
| MCW0200         | 1                       | 302.4 | 111.3           |
| rs13921245      | 1                       | 310.4 | 113.5           |
| rs14876047      | 1                       | 323.6 | 116.9           |
| rs15402046      | 1                       | 333.8 | 122.8           |
| ADL0353         | 1                       | 337.6 | 124.2           |
| rs14884222      | 1                       | 351.5 | 128.7           |

|                  |   |       |       |
|------------------|---|-------|-------|
| RBL3441          | 1 | 352.7 | 129.1 |
| MCW0036          | 1 | 353.5 | 129.3 |
| RBL1448          | 1 | 354.3 | 130.8 |
| rs14887388       | 1 | 360.4 | 134.4 |
| rs13625427       | 1 | 372.0 | 138.0 |
| LEI0107          | 1 | 387.4 | 143.7 |
| rs13951254       | 1 | 391.0 | 147.8 |
| rs13954000       | 1 | 401.1 | 150.1 |
| rs13958072       | 1 | 407.0 | 156.9 |
| rs14905876       | 1 | 407.7 | 157.1 |
| LEI0079          | 1 | 410.6 | 158.4 |
| LEI0162          | 1 | 426.3 | 169.1 |
| ADL0245          | 1 | 434.6 | 171.7 |
| rs13552040       | 1 | 435.3 | 171.9 |
| rs15502284       | 1 | 448.0 | 175.2 |
| rs14920831       | 1 | 455.4 | 177.7 |
| rs15516954       | 1 | 466.8 | 181.1 |
| rs13982336       | 1 | 473.1 | 182.7 |
| IAP1-1-174542266 | 1 | 481.1 | na    |
| rs14931269       | 1 | 483.5 | 189.3 |
| LEI0134          | 1 | 490.5 | 191.8 |
| rs14935422       | 1 | 493.2 | 193.3 |
| RBL2401          | 1 | 494.6 | 195.1 |
| GCT0001          | 1 | 497.1 | 197.6 |
| rs15054320       | 2 | 0.0   | 2.0   |
| rs13534858       | 2 | 14.8  | 4.4   |
| rs14134143       | 2 | 25.7  | 7.0   |
| rs15884716       | 2 | 30.0  | 8.8   |
| rs14139143       | 2 | 35.2  | 11.6  |
| ADL0190          | 2 | 39.0  | 15.3  |
| rs14143285       | 2 | 39.6  | 15.7  |
| MCW0247          | 2 | 47.6  | 19.4  |
| rs15910200       | 2 | 48.0  | 19.4  |
| rs15075023       | 2 | 60.3  | 24.1  |
| rs15077078       | 2 | 67.2  | 26.9  |
| rs15081191       | 2 | 81.5  | 32.4  |
| rs15083693       | 2 | 90.0  | 35.0  |
| MCW0063          | 2 | 95.2  | 37.9  |
| rs13670674       | 2 | 103.1 | 41.2  |
| rs13671945       | 2 | 110.7 | 43.4  |
| rs14178920       | 2 | 127.5 | 47.9  |
| rs15099222       | 2 | 132.4 | 50.4  |
| MCW0062          | 2 | 134.1 | 56.1  |
| MCW0293          | 2 | 143.4 | 59.6  |
| rs15105085       | 2 | 146.6 | 60.5  |
| rs15107772       | 2 | 155.2 | 63.4  |
| rs14196021       | 2 | 160.4 | 65.5  |
| rs14200463       | 2 | 177.1 | 68.9  |
| LEI0096          | 2 | 183.2 | 71.0  |
| rs16039935       | 2 | 186.2 | 77.5  |

|            |   |       |       |
|------------|---|-------|-------|
| ADL0157    | 2 | 191.7 | 80.7  |
| MCW0179    | 2 | 199.9 | 86.6  |
| MCW0087    | 2 | 201.7 | 87.2  |
| rs15126683 | 2 | 207.7 | 91.2  |
| rs14219471 | 2 | 216.4 | 93.7  |
| UMA02      | 2 | 220.1 | 96.1  |
| RBL4114    | 2 | 224.4 | 100.0 |
| LEI0147    | 2 | 228.2 | 101.6 |
| RBL3577    | 2 | 229.7 | 102.2 |
| RBL3422    | 2 | 229.9 | 102.2 |
| rs14225365 | 2 | 231.4 | 103.3 |
| rs16092012 | 2 | 242.8 | 108.0 |
| RBL8       | 2 | 251.0 | 111.1 |
| rs14232457 | 2 | 253.2 | 112.1 |
| RBL2593    | 2 | 253.9 | 112.8 |
| rs13796585 | 2 | 257.1 | 114.7 |
| MCW0234    | 2 | 257.3 | 114.9 |
| rs16107541 | 2 | 263.0 | 117.4 |
| rs16108913 | 2 | 265.5 | 119.0 |
| rs14240558 | 2 | 273.3 | 122.4 |
| rs14242430 | 2 | 276.2 | 125.0 |
| rs13731505 | 2 | 286.4 | 129.5 |
| MCW0245    | 2 | 296.2 | 131.9 |
| RBL3465    | 2 | 302.2 | na    |
| rs16136501 | 2 | 307.3 | 135.5 |
| LEI0070    | 2 | 311.4 | 139.6 |
| rs13762257 | 2 | 319.6 | 143.8 |
| MCW0320    | 2 | 323.2 | 145.8 |
| rs14260168 | 2 | 327.4 | 149.7 |
| LEI0031    | 2 | 330.8 | 153.3 |
| MCW0311    | 2 | 331.7 | 153.7 |
| rs13758611 | 2 | 332.6 | 154.4 |
| rs14308203 | 3 | 0.0   | 2.4   |
| rs14310908 | 3 | 14.9  | 4.6   |
| MCW0169    | 3 | 23.0  | 6.6   |
| rs16222521 | 3 | 37.3  | 9.5   |
| rs14084016 | 3 | 50.5  | 15.0  |
| rs13717180 | 3 | 60.7  | 18.8  |
| rs14326182 | 3 | 77.5  | 24.0  |
| MCW0222    | 3 | 78.5  | 24.2  |
| rs14330022 | 3 | 86.0  | 27.8  |
| rs14336675 | 3 | 105.1 | 33.7  |
| rs15321683 | 3 | 109.1 | 35.5  |
| ADL0155    | 3 | 112.8 | 37.6  |
| rs14341292 | 3 | 113.1 | 37.8  |
| rs13675715 | 3 | 127.0 | 42.4  |
| ADL0371    | 3 | 140.0 | 45.2  |
| MCW0004    | 3 | 154.2 | 51.6  |
| rs16281414 | 3 | 163.7 | 57.1  |
| RBL2668    | 3 | 172.3 | 60.2  |

|            |   |       |       |
|------------|---|-------|-------|
| rs15366849 | 3 | 172.9 | 61.3  |
| rs14367728 | 3 | 178.6 | 65.6  |
| rs15375524 | 3 | 182.2 | 68.3  |
| rs14376988 | 3 | 200.9 | 75.5  |
| MCW0224    | 3 | 207.2 | 79.8  |
| ADL0024    | 3 | 216.5 | 83.4  |
| rs13696669 | 3 | 224.1 | 87.9  |
| rs14391415 | 3 | 227.6 | 90.5  |
| MCW0207    | 3 | 231.1 | 92.9  |
| rs14397663 | 3 | 238.7 | 96.8  |
| rs14400934 | 3 | 248.6 | 100.1 |
| LEI0065    | 3 | 255.2 | 103.8 |
| rs13702405 | 3 | 256.6 | 103.9 |
| rs14408135 | 3 | 262.8 | 107.3 |
| rs15471980 | 4 | 0.0   | 1.0   |
| ADL0143    | 4 | 1.5   | 1.4   |
| ADL0317    | 4 | 14.3  | 3.5   |
| rs14421644 | 4 | 20.3  | 4.1   |
| rs15484517 | 4 | 30.7  | 6.8   |
| rs13643096 | 4 | 33.7  | 9.4   |
| rs14428592 | 4 | 40.8  | 11.4  |
| rs15500313 | 4 | 49.0  | 13.5  |
| rs14435605 | 4 | 64.2  | 17.7  |
| ADL0145    | 4 | 65.5  | 17.9  |
| MCW0251    | 4 | 67.0  | 19.2  |
| rs14438666 | 4 | 68.4  | 24.6  |
| rs15522441 | 4 | 74.2  | 29.5  |
| rs14446940 | 4 | 86.3  | 33.1  |
| rs15542429 | 4 | 97.4  | 37.0  |
| rs15544037 | 4 | 98.0  | 38.1  |
| MCW0091    | 4 | 102.5 | 39.7  |
| rs15549573 | 4 | 106.1 | 40.9  |
| rs15554707 | 4 | 110.6 | 44.0  |
| LEI0125    | 4 | 111.4 | 44.7  |
| rs14462677 | 4 | 119.7 | 47.8  |
| rs15581865 | 4 | 140.3 | 55.0  |
| LEI0076    | 4 | 151.4 | 62.1  |
| rs14479812 | 4 | 153.4 | 63.2  |
| rs15607084 | 4 | 161.9 | 67.9  |
| RBL1352    | 4 | 172.7 | 71.6  |
| rs14488074 | 4 | 173.0 | 71.6  |
| LEI0148    | 4 | 173.7 | na    |
| rs14491521 | 4 | 182.4 | 79.5  |
| rs13664708 | 4 | 185.3 | 81.1  |
| MCW0098    | 4 | 186.8 | 81.5  |
| rs13666021 | 4 | 192.3 | 84.6  |
| rs16444662 | 4 | 193.8 | 85.5  |
| LEI0085    | 4 | 195.3 | 85.9  |
| LEI0073    | 4 | 204.5 | 88.4  |
| rs15643977 | 4 | 210.8 | 91.7  |

|            |   |       |      |
|------------|---|-------|------|
| rs14508809 | 5 | 0.0   | 1.6  |
| rs15343523 | 5 | 6.5   | 5.5  |
| rs14511732 | 5 | 19.9  | 9.4  |
| rs15661711 | 5 | 28.1  | 12.1 |
| rs13757471 | 5 | 33.1  | 14.4 |
| MCW0193    | 5 | 39.1  | 15.9 |
| RBL1369    | 5 | 43.2  | 17.3 |
| RBL2307    | 5 | 43.8  | 17.7 |
| rs15674552 | 5 | 48.0  | 18.5 |
| rs14693539 | 5 | 50.8  | 19.6 |
| MCW0038    | 5 | 55.6  | 21.6 |
| rs15679760 | 5 | 61.8  | 24.4 |
| rs13584119 | 5 | 75.4  | 29.8 |
| MCW0078    | 5 | 81.2  | 31.9 |
| rs13585490 | 5 | 84.7  | 36.3 |
| rs13586869 | 5 | 102.3 | 41.0 |
| MCW0029    | 5 | 106.0 | 44.2 |
| rs16498806 | 5 | 106.0 | 44.7 |
| LEI0149    | 5 | 108.7 | 46.5 |
| MCW0081    | 5 | 120.5 | 51.4 |
| rs16514663 | 5 | 136.3 | 56.1 |
| rs15743161 | 5 | 151.1 | 59.1 |
| rs16522750 | 5 | 164.1 | 61.3 |
| LEI0192    | 6 | 0.0   | 4.0  |
| MCW0118    | 6 | 0.7   | 4.0  |
| rs15758001 | 6 | 6.7   | 5.0  |
| rs16537104 | 6 | 16.5  | 8.5  |
| rs15778112 | 6 | 21.1  | 11.7 |
| rs15780532 | 6 | 23.2  | 12.9 |
| MCW0250    | 6 | 24.7  | 16.6 |
| rs15800133 | 6 | 44.5  | 25.4 |
| rs14588347 | 6 | 52.5  | 28.6 |
| ADL0377    | 6 | 56.2  | 29.7 |
| rs14591306 | 6 | 60.3  | 31.3 |
| LEI0196    | 6 | 60.9  | 31.3 |
| rs14593897 | 6 | 69.7  | 33.6 |
| rs14598438 | 7 | 0.0   | 1.5  |
| rs13739720 | 7 | 16.1  | 3.6  |
| rs13740451 | 7 | 31.0  | 5.4  |
| rs15837786 | 7 | 35.6  | 9.0  |
| rs13783972 | 7 | 36.6  | 11.3 |
| MCW0120    | 7 | 40.0  | 11.9 |
| rs14608276 | 7 | 44.5  | 13.1 |
| rs15852323 | 7 | 54.7  | 17.2 |
| rs15856536 | 7 | 61.5  | 20.6 |
| rs14616506 | 7 | 71.7  | 24.6 |
| ADL0279    | 7 | 74.3  | 25.3 |
| rs15870814 | 7 | 80.4  | 28.0 |
| MCW0236    | 7 | 87.6  | 29.7 |
| rs16604163 | 7 | 88.0  | 29.8 |

|            |    |       |      |
|------------|----|-------|------|
| rs15882678 | 7  | 97.8  | 33.3 |
| rs16612776 | 7  | 111.8 | 35.8 |
| ADL0169    | 7  | 120.2 | 38.0 |
| rs16620523 | 8  | 0.0   | 3.8  |
| MCW0305    | 8  | 25.7  | 7.0  |
| rs14642627 | 8  | 36.0  | 14.6 |
| rs14650356 | 8  | 71.3  | 22.3 |
| rs14652607 | 8  | 79.9  | 24.3 |
| rs16644389 | 8  | 83.1  | 25.9 |
| rs14655901 | 8  | 90.1  | 27.4 |
| ADL0172    | 8  | 97.2  | 28.8 |
| rs15940094 | 8  | 98.7  | 29.2 |
| ADL0278    | 8  | 100.3 | 29.9 |
| rs16650965 | 9  | 0.0   | 1.7  |
| MCW0024    | 9  | 53.2  | 4.9  |
| rs14669284 | 9  | 59.0  | 5.4  |
| rs15957507 | 9  | 65.9  | 8.3  |
| rs14662996 | 9  | 69.5  | 10.6 |
| MCW0135    | 9  | 73.0  | 13.7 |
| rs14674285 | 9  | 85.6  | 15.1 |
| rs14676340 | 9  | 100.3 | 16.9 |
| rs14678700 | 9  | 107.9 | 20.6 |
| ADL0219    | 9  | 121.4 | 22.6 |
| MCW0134    | 9  | 135.8 | 24.8 |
| MCW0228    | 10 | 0.0   | 0.7  |
| rs13999825 | 10 | 15.0  | 1.6  |
| ADL0209    | 10 | 31.7  | 4.1  |
| MCW0194    | 10 | 38.8  | 6.7  |
| rs14003423 | 10 | 40.0  | 7.4  |
| rs13799452 | 10 | 41.2  | 9.6  |
| MCW0067    | 10 | 41.9  | 9.6  |
| rs14006050 | 10 | 46.2  | 12.6 |
| ADL0272    | 10 | 46.5  | 12.7 |
| rs14009067 | 10 | 59.0  | 15.2 |
| ADL0106    | 10 | 65.0  | 16.5 |
| rs15589031 | 10 | 75.0  | 18.9 |
| ADL0158    | 10 | 77.1  | 19.4 |
| rs14013921 | 10 | 84.3  | 21.4 |
| rs14957451 | 11 | 0.0   | 0.9  |
| rs14958678 | 11 | 11.5  | 1.9  |
| rs14019836 | 11 | 14.1  | 5.2  |
| ADL0123    | 11 | 15.2  | 5.7  |
| rs14022357 | 11 | 27.6  | na   |
| rs14963832 | 11 | 33.9  | 10.9 |
| rs14025658 | 11 | 38.1  | 13.8 |
| RBL3085    | 11 | 45.5  | 16.9 |
| ADL0308    | 11 | 48.7  | 17.4 |
| rs14966910 | 11 | 52.9  | 18.7 |
| ABR0037    | 11 | 69.5  | 20.6 |
| rs14030286 | 12 | 0.0   | 0.7  |

|            |    |      |      |
|------------|----|------|------|
| ADL0372    | 12 | 0.2  | 0.7  |
| rs13621493 | 12 | 26.7 | 2.5  |
| LEI0131    | 12 | 37.5 | 4.9  |
| rs14035356 | 12 | 38.0 | 5.8  |
| rs14039242 | 12 | 44.0 | 9.2  |
| ADL0044    | 12 | 54.1 | 12.3 |
| LEI0099    | 12 | 54.5 | 12.4 |
| rs15662367 | 12 | 63.4 | 14.7 |
| rs14046447 | 12 | 76.1 | 17.3 |
| rs14048107 | 12 | 81.6 | 18.7 |
| rs15675703 | 13 | 0.0  | 0.7  |
| rs14990028 | 13 | 30.2 | 5.2  |
| rs14051703 | 13 | 32.0 | 6.9  |
| ADL0147    | 13 | 34.0 | 8.1  |
| rs14994099 | 13 | 35.0 | 8.3  |
| RBL3916    | 13 | 36.8 | 8.9  |
| ROS00325   | 13 | 38.9 | 9.4  |
| MCW0213    | 13 | 42.0 | 10.4 |
| MCW0315    | 13 | 59.0 | 14.4 |
| rs14998975 | 13 | 60.9 | 14.9 |
| rs14064615 | 13 | 70.6 | 17.0 |
| ADL0225    | 13 | 71.7 | 17.2 |
| rs15000764 | 13 | 73.9 | 18.4 |
| ADL0118    | 14 | 0.0  | 0.1  |
| rs13530010 | 14 | 0.1  | 0.3  |
| MCW0296    | 14 | 0.9  | 1.5  |
| rs13531951 | 14 | 28.3 | 5.1  |
| rs15008964 | 14 | 34.4 | 6.8  |
| rs15010436 | 14 | 37.1 | 8.9  |
| LEI0066    | 14 | 74.5 | 14.7 |
| rs15763765 | 15 | 0.0  | 1.9  |
| LEI0083    | 15 | 3.9  | 2.8  |
| rs15019494 | 15 | 5.7  | 4.0  |
| ADL0039    | 15 | 11.6 | 5.7  |
| rs15021350 | 15 | 15.0 | 6.4  |
| rs14092594 | 15 | 25.4 | 8.2  |
| rs15024160 | 15 | 31.0 | 9.7  |
| MCW0211    | 15 | 40.0 | 10.8 |
| rs15026117 | 15 | 53.3 | 11.9 |
| rs15788101 | 16 | -    | 0.1  |
| rs15026773 | 16 | 0.0  | 0.1  |
| rs15026791 | 16 | 0.0  | 0.1  |
| ADL0199    | 17 | 0.0  | 0.7  |
| rs14104304 | 17 | 4.4  | 1.7  |
| rs13734134 | 17 | 19.9 | 3.5  |
| ADL0149    | 17 | 33.9 | 5.7  |
| rs15031008 | 17 | 35.8 | 5.9  |
| rs15029104 | 17 | 48.5 | 8.1  |
| rs15027463 | 17 | 54.6 | 9.6  |
| rs15027195 | 17 | 54.7 | 10.1 |

|              |    |      |      |
|--------------|----|------|------|
| rs14106100   | 18 | 0.0  | 1.0  |
| rs14108386   | 18 | 15.1 | 2.7  |
| MCW0217      | 18 | 18.8 | 3.2  |
| rs13507726   | 18 | 32.3 | 4.9  |
| ADL0184      | 18 | 32.9 | 5.0  |
| rs14113801   | 18 | 41.3 | 8.0  |
| rs15833225   | 18 | 45.1 | 9.0  |
| rs14115711   | 19 | 0.0  | 0.9  |
| rs14116385   | 19 | 7.3  | 1.5  |
| rs14118674   | 19 | 22.8 | 3.3  |
| rs15047231   | 19 | 27.7 | 4.3  |
| rs15048343   | 19 | 34.4 | 5.6  |
| rs15848432   | 19 | 37.3 | 6.1  |
| rs14122543   | 19 | 40.6 | 7.2  |
| rs14124079   | 19 | 46.6 | 9.6  |
| MCW0119      | 20 | 0.0  | 0.4  |
| rs15169246   | 20 | 7.3  | 0.9  |
| ADL0125      | 20 | 28.4 | 3.1  |
| rs15171181   | 20 | 32.4 | 3.4  |
| rs14272231   | 20 | 37.9 | 4.7  |
| rs15173767   | 20 | 43.8 | 6.2  |
| rs14274909   | 20 | 45.3 | 7.1  |
| rs14276041   | 20 | 48.3 | 8.1  |
| rs14278769   | 20 | 65.0 | 10.8 |
| rs13635174   | 20 | 68.6 | 11.9 |
| MC3R-NA-1035 | 20 | 68.8 | 12.0 |
| MC3R_PYRO    | 20 | 68.8 | 12.0 |
| rs13795178   | 20 | 71.8 | 13.9 |
| rs13602346   | 21 | 0.0  | 0.4  |
| rs14282175   | 21 | 14.0 | 1.5  |
| rs14283139   | 21 | 18.2 | 2.6  |
| rs15182893   | 21 | 25.0 | 3.4  |
| rs16181928   | 21 | 46.1 | 5.2  |
| rs14286166   | 21 | 61.5 | 6.6  |
| rs15191004   | 22 | 0.0  | 2.9  |
| rs13820393   | 22 | 2.7  | 3.4  |
| rs14287506   | 23 | 0.0  | 0.2  |
| rs15194003   | 23 | 7.9  | 1.0  |
| rs14289029   | 23 | 16.8 | 1.8  |
| rs15205573   | 23 | 47.4 | 5.0  |
| rs15207546   | 23 | 49.7 | 5.6  |
| rs13603923   | 24 | 0.0  | 0.5  |
| rs16194400   | 24 | 3.1  | 1.8  |
| RBL1526      | 24 | 7.4  | 2.3  |
| rs14294624   | 24 | 11.4 | 2.9  |
| ROS00302     | 24 | 15.4 | na   |
| LEI0069      | 24 | 39.9 | 5.1  |
| rs14297486   | 24 | 51.5 | 6.1  |
| rs16740409   | 25 | 0.0  | na   |
| RBL3432      | 25 | 17.4 | 0.8  |



|                       |        |      |      |
|-----------------------|--------|------|------|
| RBL4442               | 25     | 38.6 | na   |
| RBL625                | 25     | 40.4 | na   |
| rs14710054            | 25     | 40.5 | na   |
| RBL2937               | 25     | 53.1 | 1.9  |
| rs14416247            | 26     | 0.0  | 0.4  |
| SNP-152-100-21801-S-1 | 26     | 2.0  | na   |
| rs16200368            | 26     | 6.3  | 1.4  |
| MCW0286               | 26     | 13.6 | 1.9  |
| MCW0209               | 26     | 15.9 | 2.1  |
| MCW0069               | 26     | 18.9 | 2.4  |
| rs16202845            | 26     | 32.4 | 3.3  |
| LEI0074               | 26     | 52.9 | 4.7  |
| RBL280                | 27     | 0.0  | 0.4  |
| rs15241802            | 27     | 0.9  | 1.2  |
| rs14301476            | 27     | 4.7  | 1.5  |
| rs13620274            | 27     | 9.0  | 2.1  |
| MCW0076               | 27     | 33.0 | na   |
| rs14303776            | 27     | 38.6 | 3.4  |
| ADL0376               | 27     | 47.6 | 3.9  |
| MCW0292               | 27     | 57.4 | na   |
| rs16208538            | 27     | 59.0 | 4.2  |
| rs15245588            | 28     | 0.0  | 0.7  |
| rs14306112            | 28     | 33.7 | 2.1  |
| rs16211629            | 28     | 37.7 | 2.4  |
| MCW0227               | 28     | 41.5 | 2.5  |
| rs16212707            | 28     | 51.7 | 4.1  |
| MCW0188               | LG1    | 0.0  | na   |
| ROS00306              | LG1    | 1.9  | na   |
| RBL3889               | LG1    | 3.3  | 31.4 |
| RBL4985               | LG1    | 5.1  | 38.3 |
| RBL4854               | LG1    | 22.9 | 42.0 |
| rs15989709            | LG1    | 23.5 | na   |
| RBL1494               | LG1    | 25.5 | 0.9  |
| GCT004                | Chr_UN | -    | na   |
| rs16748775            | Chr_UN | -    | na   |

<sup>a</sup> Chr\_UN corresponds to sequence contigs that have not been incorporated in the genome assembly. LG1 represents linkage group E22C19W28E50C23. No linkage was detected between rs15788101 and the two other markers located on chr16.

<sup>b</sup> NA indicates that there is no position on the current assembly (May 2006).
